# Supplementary material for: Myelin remodeling through experience-dependent oligodendrogenesis in the adult somatosensory cortex
Source: Springer Nature journal article supplement (doi:10.1038/s41593-018-0121-5), 2018-03-19
Supplement: 41593_2018_121_MOESM3_ESM.pdf [file 41593_2018_121_MOESM3_ESM.pdf]

## Supplementary Table 1. Key Resources

### Experimental Models: Mouse lines

| Organism                                              | Source             | Species      | Identifier                |
|-------------------------------------------------------|--------------------|--------------|---------------------------|
| STOCK Tg(Mobp-EGFP)<br>IN1Gsat/Mmucd                  | MMRRC              | Mus musculus | RRID:MMRRC_030483-<br>UCD |
| FVB.Cg-Tg(Cspg4-EGFP*)HDbe/J                          | Jackson Laboratory | Mus musculus | RRID:IMSR_JAX:022735      |
| B6;129S6-<br>Gt(ROSA)26Sortm14(CAG-<br>tdTomato)Hze/J | Jackson Laboratory | Mus musculus | RRID:IMSR_JAX:007908      |
| Olig2tm1(cre/Esr1*)Htak/Olig2tm1<br>(cre/Esr1*)Htak   | RBRC               | Mus musculus | RRID:MGI:5426962          |

### Recombinant DNA

| Virus         | Source                      | Identifier |
|---------------|-----------------------------|------------|
| AAV9-MBP-eGFP | gift from Dr. Thomas McCown | This paper |

### Software and Algorithms

| Name                  | Source                                                              | Identifier      |
|-----------------------|---------------------------------------------------------------------|-----------------|
| ZEN Blue/Black        | Zeiss                                                               | RRID:SCR_013672 |
| ImageJ                | <a href="https://imagej.nih.gov/ij/">https://imagej.nih.gov/ij/</a> | RRID:SCR_003070 |
| Fiji                  | <a href="http://fiji.sc">http://fiji.sc</a>                         | RRID:SCR_002285 |
| Adobe Illustrator CS6 | Adobe                                                               | RRID:SCR_014198 |
| Origin 8.0            | OriginLab Corp.                                                     | RRID:SCR_014212 |
| Imaris                | Bitplane                                                            | RRID:SCR_007370 |

## Supplementary Table 2. Key Resources (Primary and Secondary antibodies)

### Primary antibodies

| Target Proteins (or markers) | Host species | Source                                                         | Dilution | Catalog number | Identifier                           |
|------------------------------|--------------|----------------------------------------------------------------|----------|----------------|--------------------------------------|
| Aspartoacylase (ASPA)        | Rabbit       | Genetex                                                        | 1:1500   | GTX113389      | RRID:AB_2036283                      |
| Caspr                        | Guinea pig   | gift from M. A. Bhat                                           | 1:1500   | n/a            | Bhat et al., 2001;<br>PMID: 11395000 |
| CNPase                       | Rabbit       | Cell Signaling                                                 | 1:500    | 5664           | RRID:AB_10705523                     |
| EGFP                         | Goat         | SICGEN                                                         | 1:150    | AB0020-200     | RRID:AB_2333099                      |
| EGFP                         | Chicken      | Aves lab                                                       | 1:1500   | GFP-1020       | RRID:AB_10000240                     |
| dsRed                        | Rabbit       | CloneTech                                                      | 1:500    | 632496         | RRID:AB_10013483                     |
| MBP                          | Mouse        | Sternberger<br>Monoclonal                                      | 1:2000   | 808401         | RRID:AB_2564741                      |
| NaV Pan                      | Mouse        | Sigma-Aldrich                                                  | 1:1000   | S8809          | RRID:AB_477552                       |
| Neurofilament                | Mouse        | Covance                                                        | 1:1000   | SMI-31R        | RRID:AB_10122491                     |
| NG2                          | Guinea pig   | Generated in D.E.<br>Bergles lab against<br>entire NG2 protein | 1:4000   | n/a            | Kang et al., 2013;<br>PMID: 23542689 |
| PDGFaR                       | Rabbit       | Cell Signaling                                                 | 1:500    | 3174S          | RRID:AB_2162345                      |

### Secondary antibodies

| Target species  | Conjugate | Source         | Dilution | Catalog number | Identifier      |
|-----------------|-----------|----------------|----------|----------------|-----------------|
| Anti-Rabbit     | Alexa 488 | Jackson Immuno | 1:500    | 711-546-152    | RRID:AB_2340619 |
| Anti-Rabbit     | Cy3       | Jackson Immuno | 1:500    | 711-166-152    | RRID:AB_2313568 |
| Anti-Rabbit     | Cy5       | Jackson Immuno | 1:500    | 711-606-152    | RRID:AB_2340625 |
| Anti-Mouse      | Alexa 488 | Jackson Immuno | 1:500    | 715-546-150    | RRID:AB_2340849 |
| Anti-Mouse      | Cy3       | Jackson Immuno | 1:500    | 715-166-151    | RRID:AB_2340817 |
| Anti-Mouse      | Cy5       | Jackson Immuno | 1:500    | 715-175-151    | RRID:AB_2340820 |
| Anti-Guinea Pig | FITC      | Jackson Immuno | 1:500    | 706-096-148    | RRID:AB_2340454 |
| Anti-Guinea Pig | Cy3       | Jackson Immuno | 1:500    | 706-166-148    | RRID:AB_2340461 |
| Anti-Guinea Pig | Cy5       | Jackson Immuno | 1:500    | 706-606-148    | RRID:AB_2340477 |
| Anti-Goat       | Alexa 488 | Jackson Immuno | 1:500    | 705-546-147    | RRID:AB_2340430 |
| Anti-Goat       | Cy3       | Jackson Immuno | 1:500    | 705-166-147    | RRID:AB_2340413 |
| Anti-Chicken    | Alexa 488 | Jackson Immuno | 1:500    | 703-546-155    | RRID:AB_2340376 |

\*All secondary antibodies are F(ab')<sub>2</sub> fragments purified from donkey.
